# Supplementary material for: A novel route towards formylated 1,3-dithiole-2-thiones via an unprecedented allylic 1,4-diol rearrangement
Source: Royal Society of Chemistry journal article supplement (doi:10.1039/b009550h), 2001-01-01
Supplement: b009550h.doc [file b009550h.doc]

Molecular structure of compound **6**, isolated by fractional crystallisation as the R,R-diastereomer. Selected bond lengths (for one molecule only): C(1)-S(1)=1.654(2);C(1)-S(2)=1.735(2);C(1)-S(3)=1.735(2);C(2)-C(3)=1.326(3);C(2)-C(4)=1.505(3);C(2)-S(2)=1.724(2);C(3)-C(5)=1.517(3);C(3)-S(3)=1.723(2);C(4)-O(1)=1.441(2);C(5)-O(1)=1.434(2)Å respectively.

*Crystal Data for* **6**: C19H16O3S3, *Mr* = 388.5, Triclinic space group P-1, a = 10.349(2), b = 12.081(2), c = 15.099(3)Å,  = 91.00(3),  = 103.07(3),  = 90.72(3), U = 1838.3(6)Å3, Z = 4, Dc = 1.404g cm-3,  = 0.418mm-1, F(000) = 808, crystal size 0.2 x 0.1 x 0.1mm, 8248 unique data from 27358 measured reflections (Rint = 0.0490). 456 parameters refined to R1 = 0.0412 and *w*R2 = 0.0948 [I>2(I)] (R1 = 0.0651 and *w*R2 = 0.1038 for all data), with residual electron densities of 0.324 and –0.350eÅ-3.
